# Supplementary material for: Proteomic Comparative Analysis of Pregnancy Serum Facilitating Hepatitis E Virus Replication in Hepatoma Cells
Source: Preprints.org preprint supplement (doi:10.20944/preprints201703.0025.v1), 2017-03-06
Supplement: Supplementary file 3 [file supplementary]

**Supplementary file of**

**Proteomic comparative analysis of pregnancy serum facilitating hepatitis E virus replication in hepatoma cells**

Li Yi1, 2, Yanhong Bi1, Wenhai Yu3,Chenchen Yang1, Jue Wang1, Feiyan Long1, Yunlong Li1, Fen Huang1*, Xiuguo Hua2*

**Supplement 1.** Serum relative significant differences in the expression of the five HEV infection-modulated proteins through Western blot assay.

|  | **HEV Infection** | **FBS vs Healthy non-pregnant women** | **FBS vs Third trimester pregnancy** | **Healthy non-pregnant women vs Third trimester pregnancy** |
| --- | --- | --- | --- | --- |
| **FLNA** | NC | ns | ns | ns |
|  | 4h | *** | *** | *** |
|  | 12h | *** | *** | *** |
|  | 24h | ns | *** | *** |
|  | 48h | ns | *** | *** |
|  |  |  |  |  |
| **TXN** | NC | ns | ns | ns |
|  | 4h | *** | *** | ns |
|  | 12h | *** | *** | ns |
|  | 24h | *** | *** | ** |
|  | 48h | *** | *** | *** |
|  |  |  |  |  |
| **CYTC** | NC | ns | ns | ns |
|  | 4h | *** | *** | *** |
|  | 12h | *** | *** | *** |
|  | 24h | *** | *** | *** |
|  | 48h | *** | *** | ** |
|  |  |  |  |  |
| **HSP70** | NC | ns | ns | ns |
|  | 4h | *** | *** | ns |
|  | 12h | *** | *** | * |
|  | 24h | *** | *** | *** |
|  | 48h | *** | *** | *** |
|  |  |  |  |  |
| **HSP90** | NC | ns | ns | ns |
|  | 4h | ns | *** | *** |
|  | 12h | *** | *** | *** |
|  | 24h | *** | *** | *** |
|  | 48h | *** | *** | *** |
|  |  |  |  |  |
| **pHSP90** | NC | ns | ns | ns |
|  | 4h | ns | *** | *** |
|  | 12h | ** | *** | *** |
|  | 24h | ** | ns | ns |
|  | 48h | *** | *** | *** |

**Supplement 2.** Time relative significant differences in the expression of the five HEV infection-modulated proteins through Western blot assay.

|  | **HEV Infection** | **NC vs 4h** | **NC vs 12h** | **NC vs 24h** | **NC vs 48h** | **4h vs 12h** | **4h vs 24h** | **4h vs 48h** | **12h vs 24h** | **12h vs 48h** | **24h vs 48h** |
| --- | --- | --- | --- | --- | --- | --- | --- | --- | --- | --- | --- |
| **FLNA** | FBS | ns | *** | ns | *** | *** | ns | *** | *** | ns | *** |
|  | Healthy non-pregnant women | *** | *** | * | *** | ns | *** | *** | *** | *** | *** |
|  | Third trimester pregnancy | *** | *** | *** | *** | *** | *** | *** | *** | *** | ns |
|  |  |  |  |  |  |  |  |  |  |  |  |
| **TXN** | FBS | *** | ns | * | ns | ** | *** | *** | ** | ns | * |
|  | Healthy non-pregnant women | *** | *** | *** | *** | ns | *** | *** | *** | *** | *** |
|  | Third trimester pregnancy | *** | *** | *** | *** | ns | ** | *** | ns | *** | *** |
|  |  |  |  |  |  |  |  |  |  |  |  |
| **CYTC** | FBS | ns | ns | *** | ns | ns | *** | ns | *** | ns | *** |
|  | Healthy non-pregnant women | *** | ** | *** | *** | *** | *** | ns | *** | *** | *** |
|  | Third trimester pregnancy | *** | *** | *** | *** | *** | *** | ns | * | *** | *** |
|  |  |  |  |  |  |  |  |  |  |  |  |
| **HSP70** | FBS | *** | *** | *** | *** | *** | *** | *** | *** | *** | *** |
|  | Healthy non-pregnant women | *** | ns | *** | *** | ** | *** | *** | *** | *** | * |
|  | Third trimester pregnancy | *** | ns | ns | ns | * | *** | ** | *** | ns | ** |
|  |  |  |  |  |  |  |  |  |  |  |  |
| **HSP90** | FBS | *** | ** | *** | *** | ns | *** | *** | *** | *** | *** |
|  | Healthy non-pregnant women | *** | *** | ns | *** | * | *** | *** | *** | ns | *** |
|  | Third trimester pregnancy | ns | ns | ** | ns | * | *** | ns | ns | ns | ** |
|  |  |  |  |  |  |  |  |  |  |  |  |
| **pHSP90** | FBS | ns | ns | *** | *** | ns | *** | *** | *** | *** | *** |
|  | Healthy non-pregnant women | * | ns | *** | *** | *** | *** | ns | ** | *** | *** |
|  | Third trimester pregnancy | *** | *** | *** | *** | *** | ns | ns | *** | *** | ns |
